# Supplementary material for: Cross-Sectional Survey on the Current Role of Clinical Pharmacists among Antimicrobial Stewardship Programmes in Catalonia: Much Ado about Nothing
Source: MDPI journal article supplement (doi:10.3390/antibiotics12040717), 2023-04-06

**Figure S1.** Antimicrobial stewardship activities performed by clinical pharmacists.

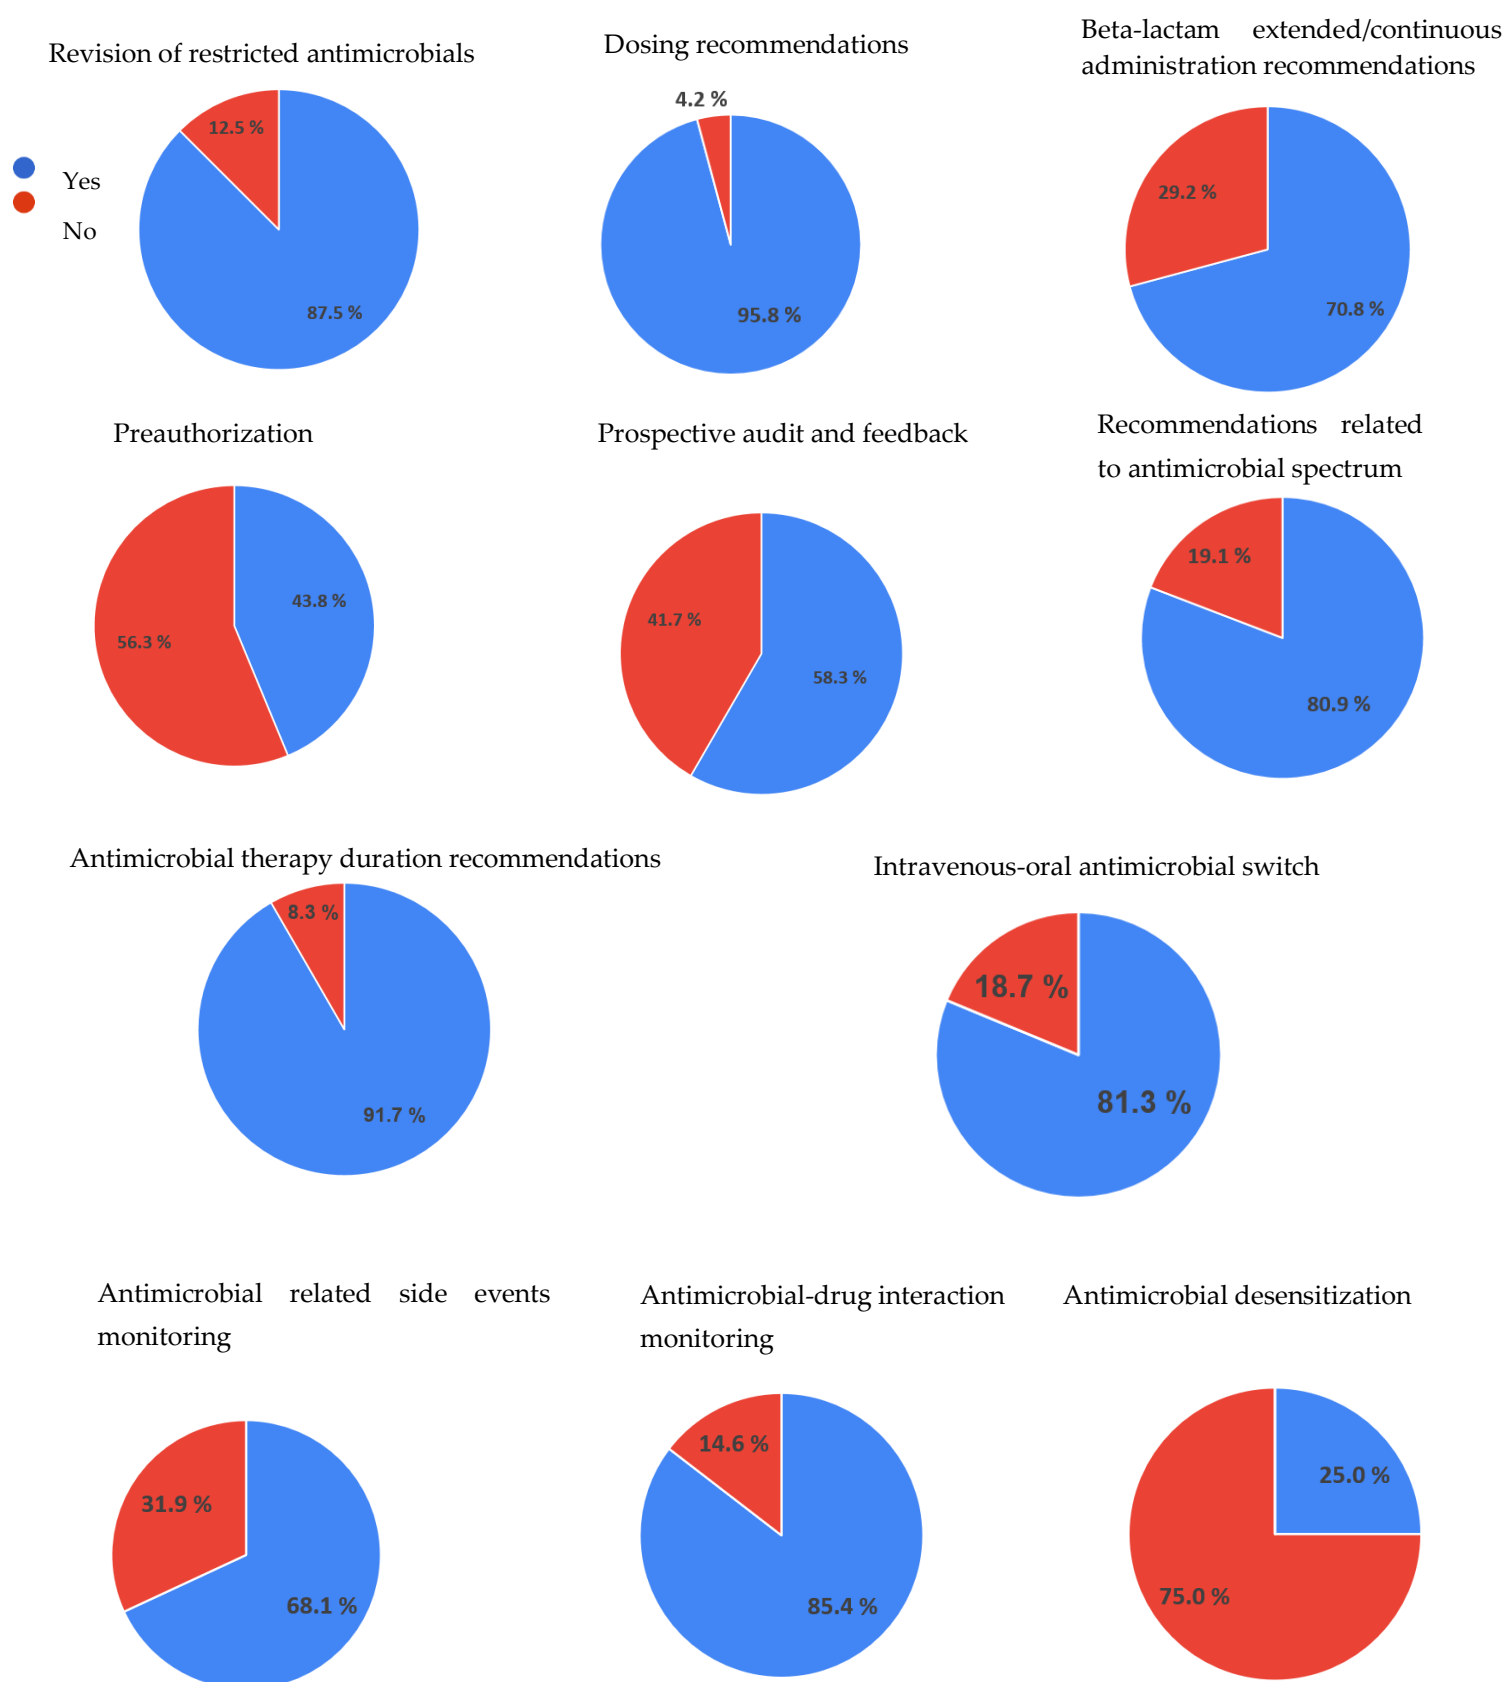

Recommendations to perform cultures or swabs

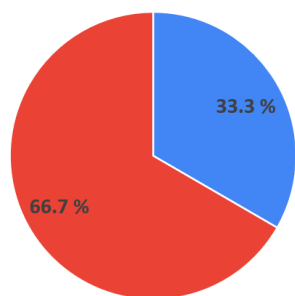

Investigation

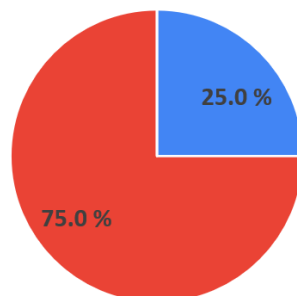

Therapeutic drug monitoring

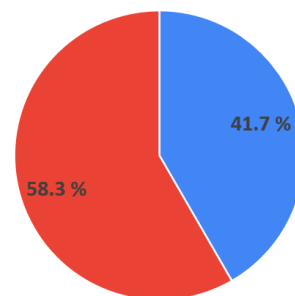

Supplement: s1 [file s1]
